# Supplementary material for: Physical Activity, Sedentary Behavior, and Long‐Term Changes in Aortic Stiffness: The Whitehall II Study
Source: PubMed Central journal article supplement (PMC5586440; doi:10.1161/jaha.117.005974), 2017-08-07
Supplement: JAH3-6-e005974-s001.pdf [file JAH3-6-e005974-s001.pdf]

# **Supplemental Material**

**Table S1.** Baseline Characteristics of Whitehall II study participants by tertiles of pulse wave velocity (2008-2009)

|                                                  | Tertiles of PWV at baseline |              |              | Spearman's Rho <sup>=</sup> |
|--------------------------------------------------|-----------------------------|--------------|--------------|-----------------------------|
|                                                  | 1                           | 2            | 3            |                             |
| <b>Pulse Wave velocity (m/s)</b>                 | 6.6 (0.6)                   | 8.1 (0.4)    | 10.7 (1.7)   | -                           |
| <b>Age</b>                                       | 63.1 (4.9)                  | 64.9 (5.5)   | 68.1 (5.6)   | 0.38**                      |
| <b>Total MET-hours/week of Physical activity</b> | 49.9 (29.1)                 | 48.7 (28.7)  | 48.6 (29.9)  | -0.04*                      |
| <b>Intensity of Physical activity</b>            |                             |              |              |                             |
| <b>Moderate to Vigorous (hours/week)</b>         | 4.1 (3.5)                   | 3.8 (3.5)    | 3.7 (3.4)    | -0.06**                     |
| <b>Mild (hours/week)</b>                         | 11.0 (7.1)                  | 11.1 (7.2)   | 11.4 (8.0)   | -0.004                      |
| <b>Type of Physical activity</b>                 |                             |              |              |                             |
| <b>Sports (hours/week)</b>                       | 3.0 (4.2)                   | 2.5 (3.8)    | 2.4 (3.9)    | -0.08**                     |
| <b>Housework (hours/week)</b>                    | 3.0 (4.1)                   | 3.1 (4.3)    | 3.1 (4.3)    | -0.02                       |
| <b>Gardening (hours/week)</b>                    | 7.2 (5.9)                   | 7.2 (6.3)    | 7.3 (6.3)    | -0.01                       |
| <b>Do It Yourself (hours/week)</b>               | 1.7 (3.1)                   | 1.7 (3.0)    | 1.6 (3.0)    | -0.005                      |
| <b>Walking (hours/week)</b>                      | 7.1 (5.7)                   | 7.2 (5.6)    | 7.6 (6.4)    | 0.01                        |
| <b>Cycling (hours/week)</b>                      | 0.4 (1.8)                   | 0.3 (1.4)    | 0.2 (1.3)    | -0.07**                     |
| <b>Sedentary Time in 1997/99</b>                 |                             |              |              |                             |
| <b>Sitting for Leisure (hours/week)</b>          | 20.2 (10.7)                 | 21.8 (11.9)  | 23.0 (11.6)  | 0.11**                      |
| <b>Sitting at Work/Commute (hours/week)</b>      | 21.9 (15.9)                 | 18.9 (15.7)  | 14.9 (14.9)  | -0.19**                     |
| <b>Systolic Blood pressure (mmHg)</b>            | 117.5 (13.4)                | 124.0 (13.9) | 132.1 (15.5) | 0.42**                      |
| <b>Total Cholesterol (mmol/l)</b>                | 5.3 (1.0)                   | 5.2 (1.0)    | 5.2 (1.1)    | -0.05**                     |
| <b>Body Mass Index (Kg/m<sup>2</sup>)</b>        | 25.4 (3.8)                  | 26.4 (3.8)   | 26.8 (3.9)   | 0.17**                      |
| <b>Waist Circumference (cm)</b>                  | 88.1 (10.9)                 | 91.9 (11.2)  | 94.1 (11.2)  | 0.23**                      |
| <b>Smoking</b>                                   |                             |              |              | 0.008                       |
| <b>Current</b>                                   | 82 (5.7 %)                  | 87 (6.0 %)   | 62 (4.3 %)   |                             |
| <b>Former</b>                                    | 622 (43.0 %)                | 679 (47.0 %) | 678 (46.9 %) |                             |
| <b>Never</b>                                     | 741 (51.3 %)                | 680 (47.0 %) | 705 (48.8 %) |                             |
| <b>Daily Alcohol Consumption</b>                 | 661 (46.6 %)                | 690 (48.6 %) | 650 (45.7 %) | 0.02                        |
| <b>History of Cardiovascular disease</b>         | 110 (7.6 %)                 | 123 (8.5 %)  | 187 (12.9 %) | 0.08**                      |
| <b>Anti-hypertensive medication</b>              | 344 (23.8 %)                | 474 (32.8 %) | 604 (41.7 %) | 0.17**                      |

Values are mean (standard deviation) for continuous variables, or numbers (%) for categorical variables.

<sup>=</sup> Spearman's correlation coefficient between baseline PWV (continuous) and baseline characteristics.

\* P-value < 0.05

\*\* P-value < 0.001

**Table S2.** Cross-sectional association between intensity and type of physical activity (2008/09) and sedentary time (1997/99) with pulse wave velocity (2008/09).

|                                                         | Mean Difference in Pulse Wave Velocity<br>(95% Confidence Interval) <sup>=</sup> |                          |
|---------------------------------------------------------|----------------------------------------------------------------------------------|--------------------------|
|                                                         | Model 1                                                                          | Model 2                  |
| <b>Total Physical activity level</b>                    |                                                                                  |                          |
| Low                                                     | Ref                                                                              | Ref                      |
| Medium                                                  | -0.15 (-0.31, 0.01)                                                              | -0.01 (-0.16, 0.15)      |
| High *                                                  | -0.37 (-0.50, -0.25)                                                             | -0.13 (-0.25, -0.01)     |
| <b>Total Physical activity (Per 1-Met hour/Week)</b>    | -0.003 (-0.004, -0.0009)                                                         | 0.0001 (-0.0016, 0.0019) |
| <b>Intensity of Physical activity (per 1-hour/week)</b> |                                                                                  |                          |
| Moderate to Vigorous *                                  | -0.049 (-0.065, -0.033)                                                          | -0.019 (-0.035, -0.004)  |
| Mild                                                    | 0.004 (-0.003, 0.011)                                                            | 0.005 (-0.001, 0.012)    |
| <b>Type of Physical activity (per 1-hour/week)</b>      |                                                                                  |                          |
| Sports *                                                | -0.043 (-0.056, -0.029)                                                          | -0.020 (-0.033, -0.006)  |
| Housework                                               | 0.006 (-0.003, 0.016)                                                            | 0.005 (-0.004, 0.014)    |
| Gardening *                                             | -0.021 (-0.034, -0.008)                                                          | -0.014 (-0.027, -0.001)  |
| Do It Yourself                                          | -0.002 (-0.021, 0.016)                                                           | 0.004 (-0.014, 0.022)    |
| Walking (Per 1-MET hour/week) *                         | 0.003 (0.000, 0.005)                                                             | 0.002 (0.000, 0.005)     |
| Cycling (Per 1-MET hour/week) **                        | -0.013 (-0.020, -0.005)                                                          | -0.007 (-0.014, 0.000)   |
| <b>Sedentary Time in 1997/99 (Per 1-hour/week)</b>      |                                                                                  |                          |
| Sitting for Leisure                                     | 0.004 (-0.001, 0.009)                                                            | 0.002 (-0.004, 0.008)    |
| Sitting at Work/Commute *                               | -0.004 (-0.008, 0.000)                                                           | -0.004 (-0.008, 0.000)   |

Model 1 values are adjusted for age, sex, ethnicity, and mean arterial pressure. Model 2 values are additionally adjusted for heart rate, body mass index, waist circumference, smoking, alcohol intake, total cholesterol levels, history of cardiovascular disease, diabetes, and hypertension medication.

<sup>=</sup> Mean difference compared to mean baseline pulse wave velocity 8.4 (SD 2.4) m/s.

\* P-value < 0.05

\*\* P-value < 0.001
